# Supplementary material for: Prominent role of organics in aerosol liquid water content over the south-eastern Atlantic during biomass burning season
Source: Copernicus journal article supplement (doi:10.5194/egusphere-2023-2319), 2023-11-09
Supplement: Supplementary file 1 [file egusphere-2023-2319-supplement.pdf]

1 **Prominent role of organics in aerosol liquid water content over the south-**  
2 **eastern Atlantic during biomass burning season**

3 **Lu Zhang<sup>1,2</sup>, Michal Segal-Rozenhaimer<sup>1,3,4</sup>, Haochi Che<sup>2</sup>, Caroline Dang<sup>3,4</sup>, Junying Sun<sup>5</sup>,**  
4 **Ye Kuang<sup>6,7</sup>, Paola Formenti<sup>8</sup>**

5 <sup>1</sup>Department of Geophysics, Porter School of the Environment and Earth Sciences, Tel Aviv  
6 University, Tel Aviv, Israel

7 <sup>2</sup>Department of Geosciences, University of Oslo, Oslo, Norway

8 <sup>3</sup>Bay Area Environmental Research Institute, Moffett Field, California, USA

9 <sup>4</sup>NASA Ames Research Center, Moffett Field, California, USA

10 <sup>5</sup>State Key Laboratory of Severe Weather & Key Laboratory of Atmospheric Chemistry, Chinese  
11 Academy of Meteorological Sciences, Beijing, China

12 <sup>6</sup>Institute for Environmental and Climate Research, Jinan University, Guangzhou, China

13 <sup>7</sup>Guangdong-Hongkong-Macau Joint Laboratory of Collaborative Innovation for Environmental  
14 Quality, Guangzhou, China

15 <sup>8</sup>Université de Paris and Univ Paris Est Creteil, CNRS, LISA, Paris, France

16 Correspondence: Michal Segal-Rozenhaimer (msegalro@tauex.tau.ac.il) and Haochi Che  
17 (haochi.che@geo.uio.no)

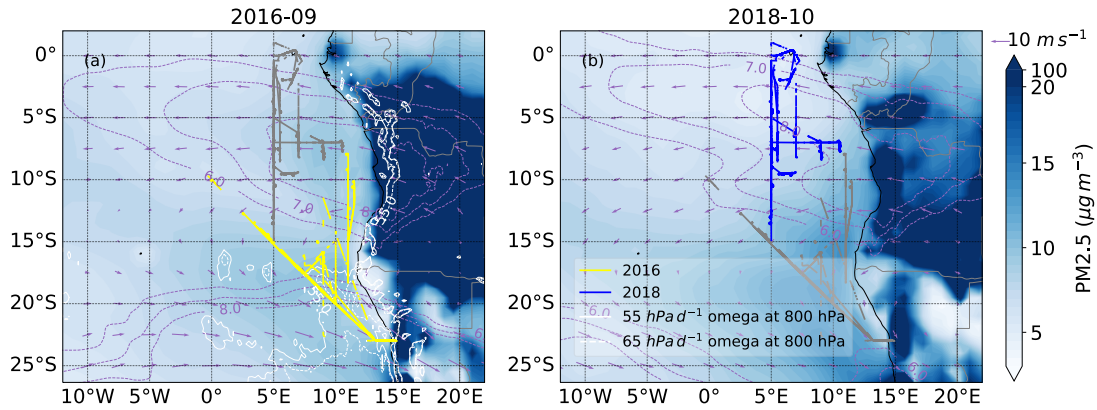

18

19 Figure S1. Maps of the (a) September mean and (b) October mean of CAMS (Copernicus  
 20 Atmosphere Monitoring Service)  $PM_{2.5}$  overlaid by the 600 hPa zonal wind (purple contours; 6, 7,  
 21 and 8  $m s^{-1}$ ), 600 hPa horizontal wind vector (purple arrows;  $m s^{-1}$ ), and ORACLES flight tracks  
 22 in 2016 (yellow) and 2018 (blue), respectively. White contours in (a) are the September mean  
 23 vertical velocity, omega, at 800 hPa. Solid and dashed lines represent the subsidence of 55 and 65  
 24 hectopascals per day ( $hPa d^{-1}$ ). Flight tracks in grey are drawn for reference.

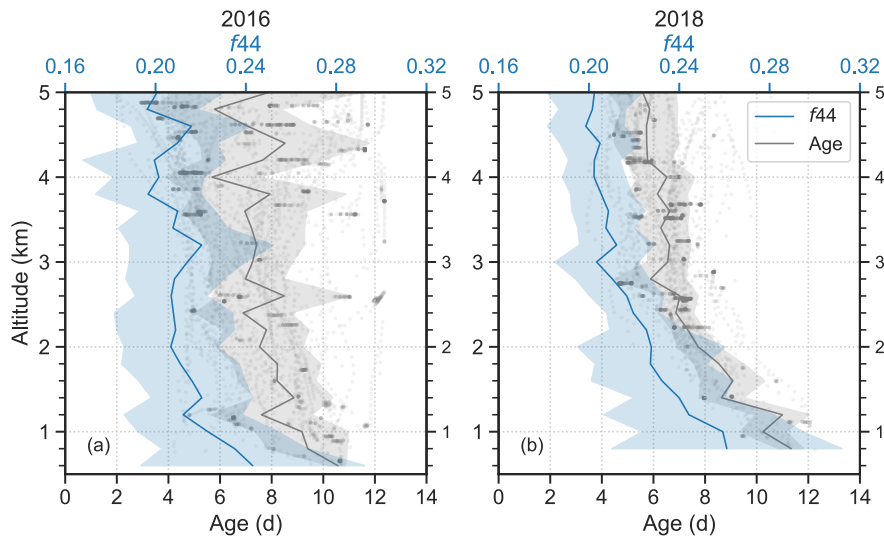

25

26 Figure S2. (a, b) Variation of  $f_{44}$  (blue) and aerosol age (black) with altitude in 2016 and 2018  
 27 ORACLES campaigns, respectively. The lines and shades represent the mean value and standard

28 deviation in every 400 m bin, respectively. Grey dots show the distribution of plume age with the  
29 altitude.
